# Supplementary material for: A statistical approach for estimating representative emission rates of biogenic volatile organic compounds and their determination for 192 plant species/genera in China
Source: Copernicus journal article supplement (doi:10.5194/acp-2016-1116), 2017-01-10
Supplement: Supplementary file [file acp-2016-1116-AC2-supplement.pdf]

1 **Author Response to Anonymous Reviewer #3**

2

3 We would like to thank Reviewer #3 for the careful reading of the manuscript, and dedication  
4 to evaluating this study. We also appreciate Reviewer #3's insightful comments and valuable  
5 suggestions which are very helpful for further improving the quality of our manuscript. Please  
6 find below our point-by-point responses to the comments and a highlight to the changes made  
7 to the manuscript. Changes to the revised manuscript are marked in blue.

8

9 **Scientific Comments:**

10 1. Line 25: "with more detailed categories, accurate emission rate intervals and  
11 representative". The observational accuracy is determined in the measurement. It has nothing  
12 to do with more detailed categories and emission rate intervals. Therefore, the method in this  
13 paper probably can't give more accurate emission emissions than previous studies.

14 **Response:**

15 Thank you for your insightful comment.

16 As you said, the observational accuracy is determined in the measurement. The foundation of  
17 our statistical method to determine representative emission rates was the reliable original  
18 emission rate observations, as suggested by Niinemets et al. (2011). This has been described  
19 in Section of Evaluation. It is also both important and challenging to estimate emission rates  
20 accurately when developing emission inventories. On this basis, we focused on exploring  
21 scientific methods for the accurate estimation of plant species-specific representative BVOC  
22 emission rates.

23 In previous inventories, the sources and estimations of emission rates varied, yielding  
24 different results for individual plant species among studies. Different studies reported  
25 distinguished values with large uncertainties due to the use of different sampling techniques  
26 and sample sizes (Guenther et al., 1994). Even if the most accurate observations were  
27 screened or conducted, it would be still necessary to find a straightforward method to  
28 determine one emission rate value for a plant species when compiling an emission inventory.  
29 Therefore, some studies have used emission categories to determine emission intensities and  
30 rates (Guenther et al., 1994; Simpson et al., 1999; Klinger et al., 2002; Wang et al., 2007). By  
31 this means, discrete emission categories (e.g., negligible, low, moderate, and high) were  
32 defined based on the emission intensity of vegetation, with a representative rate and a range  
33 of  $\pm 50\%$ . For each plant species, the emission rate was determined based on the tendency of

34 the reported emission rates to fall within certain categories. This method improved the  
35 accuracy of the final emission rates to a large extent in comparison with assigning one  
36 observation value or the average of different observations for each plant species. **However,**  
37 **the process of determining emission categories, representative emission rates, and**  
38 **ranges was not straightforward, and lacked theoretical evidence. Furthermore, some**  
39 **studies used both distinct emission categories and representative values, resulting in**  
40 **different emission rates for specific plants. Some studies used coarse classifications**  
41 **(usually three to six classes) of emission intensity, which might underestimate emission**  
42 **rates of plants with high emission potentials or overestimate emission rates of plants**  
43 **with low emission potentials. Additionally, for China, the previous studies have based on**  
44 **less local quantitative measurements.** This has been described in Section of Introduction.

45 For the drawbacks described above, it is essential and urgent to develop detailed emission  
46 categories and accurate representative values and ranges to determine emission rates  
47 accurately based on statistical analysis. It is particularly important to use local measurements  
48 of emission rates from plants, especially for China, a country with a large vegetated land area  
49 and high species diversity.

50 In our study, we first performed field measurements of BVOC emissions from 50 plant  
51 species using our established semi-static enclosure system, and obtained more local  
52 observations with higher accuracy. Then, we developed the theoretically effective approach to  
53 estimate emission rates used as basic data for BVOC emission inventories development and  
54 air quality modeling. We summarized our field measurements and reported emission rates  
55 from China and abroad to establish emission intensity categories. Our emission categories,  
56 emission intervals, and representative rates were different from those in previous studies. We  
57 included more categories, accurate emission rate intervals and representative rates. It should  
58 be noted that the added local accurate observations used to produce emission categories were  
59 still not sufficient, so the difference between our study and previous studies were not obvious.  
60 Future studies integrating more emission measurements with different intensities will create  
61 more detailed categories, accurate emission rate intervals and representative rates. Thus, the  
62 accuracy in the determination of representative emission rates for each plant will be improved  
63 to a larger extent with enhanced measurements. In the future, we will perform more  
64 measurements for further improvement of the approaches and accuracy of estimating  
65 representative emission rates.

66

67 References:

68 Guenther, A., Zimmerman, P., and Wildermuth, M.: Natural volatile organic-compound

69 emission rate estimates for United-States woodland landscapes, *Atmos. Environ.*,  
70 28,1197-1210, doi: 10.1016/1352-2310(94)90297-6, 1994.

71 Klinger, L. F., Li, Q. J., Guenther, A. B., Greenberg, J. P., Baker, B., and Bai, J. H.:  
72 Assessment of volatile organic compound emissions from ecosystems of China, *J.*  
73 *Geophys. Res.-Atmos.*, 107, 4603, doi: 10.1029/2001jd001076, 2002.

74 Niinemets, Ü., Kuhn, U., Harley, P. C., Staudt, M., Arneth, A., Cescatti, A., Ciccioli, P.,  
75 Copolovici, L., Geron, C., Guenther, A., Kesselmeier, J., Lerdau, M. T., Monson, R. K.,  
76 and Peñuelas, J.: Estimations of isoprenoid emission capacity from enclosure studies:  
77 measurements, data processing, quality and standardized measurement protocols,  
78 *Biogeosciences*, 8, 2209-2246, doi:10.5194/bg-8-2209-2011, 2011.

79 Simpson, D., Winiwarter, W., Borjesson, G., Cinderby, S., Ferreiro, A., Guenther, A., Hewitt,  
80 C. N., Janson, R., Khalil, M. A. K., Owen, S., Pierce, T. E., Puxbaum, H., Shearer, M.,  
81 Skiba, U., Steinbrecher, R., Tarrason, L., and Oquist, M. G.: Inventorying emissions  
82 from nature in Europe, *J. Geophys. Res.-Atmos.*, 104, 8113-8152, doi:  
83 10.1029/98JD02747, 1999.

84 Wang, Q. G., Han, Z. W., Wang, T. J., and Higano, Y.: An estimate of biogenic emissions of  
85 volatile organic compounds during summertime in China, *Environ. Sci. Pollut. R.*, 14,  
86 69-75, doi: 10.1065/espr2007.01.376, 2007.

87

88 2. Line 67: How many rotameters were used? Please describe it in more detail. Such as: type,  
89 company, what's the accuracy of the flow rate? How it controls the flow rate?

90 **Response: Accepted.**

91 Two rotameters were used in this study to monitor the flow rate of the zero air at 10 L  
92 min<sup>-1</sup> and 2 L min<sup>-1</sup>, respectively. They were made by Yuyao Zhenxing Instruments Co. in  
93 China. Their precision was 2.5% which was relatively low. But owing to limitations of the  
94 field experiment, we selected rotameters with portability instead of automatic mass flow  
95 controllers. Actually, the rotameter can only be used to monitor but not control the flow rate.  
96 In this study, the flow rates were calibrated and regulated respectively at 10 L min<sup>-1</sup> and 2 L  
97 min<sup>-1</sup> at the beginning of each experiment by a primary air flow calibrator (Gilian Gilibrator-2;  
98 Sensidyne, Inc., St. Petersburg, FL, USA), respectively, and were measured again at the end  
99 of each experiment. During one experiment, the flow rate scarcely changed. The flow rates  
100 could be controlled by the method described above.

101 We make a further explanation in the revised manuscript. Line 136-142, "Owing to limitations  
102 of the field experiment, rotameters were used to monitor and control the flow rate of the zero

103 air. Considering its relatively low accuracy, the flow rate had to be measured and calibrated  
104 with a primary air flow calibrator (Gilian Gilibrator-2; Sensidyne, Inc., St. Petersburg, FL,  
105 USA) at the beginning and end of each experiment." is changed to "Owing to limitations of  
106 the field experiment, two rotameters with different measuring range (LZB-4WB and  
107 LZB-6WB; Yuyao Zhenxing Instruments Co., Yuyao, China) were used to monitor the flow  
108 rate of the zero air. Considering relatively low accuracy ( $\pm 2.5\%$ ), the rotameters had to be  
109 calibrated and regulated at the scheduled flow rate with a primary air flow calibrator (Gilian  
110 Gilibrator-2; Sensidyne, Inc., St. Petersburg, FL, USA) at the beginning of each experiment  
111 and measured again at the end of each experiment. There was almost no change between the  
112 flow rates measured at the beginning and end for one experiment."

113

114 3. Line 120 and Figure 1: The measurement of PAR is not right. The PAR sensor should be  
115 placed in the Tedlar bag. Large observational errors from PAR measurement would be  
116 introduced to normalized emission rates, especially the measurements were carried out at  
117 different time. The transparence varied with solar zenith angle and the Tedlar surface. The  
118 normalized emission rates should be corrected. Please give the uncertainty of BVOC emission  
119 rates.

120 **Response: Accepted.**

121 Thank you for your insightful critique. We couldn't agree more with you.

122 The PAR sensor used in this study had to be leveled horizontally to make accurate  
123 measurements. It was not possible to place the sensor inside the bag in this way, so it was  
124 placed on the ground rather than in the Tedlar bag to monitor the PAR outside the bag. As you  
125 pointed out, the solar zenith angle and transparence of Tedlar bag would cause difference to  
126 the PAR in and outside the bag. To minimize the difference of monitored PAR in and outside  
127 bag, we chose the bag which was 50  $\mu\text{m}$  thick and could be 90–95% transparent to PAR  
128 (Ortega et al., 2008). However, the uncertainty caused by the variation of solar zenith angle  
129 could not be evaluated. As it is reported, no systematic difference was observed with the  
130 varying solar angle (Yaman et al., 2015).

131 In the added uncertainty analysis in Section 5 in the revised manuscript, we make an  
132 explanation of the uncertainty introduced by the PAR measurements, in line 453-457,  
133 "Secondly, PAR sensor was placed horizontally on the ground to monitor PAR outside the bag  
134 due to limitation of actual operation, which resulted in a difference of 5–10% for PAR  
135 between inside and outside the bag (Ortega et al., 2008; Yaman et al., 2015). This would  
136 introduce uncertainties to BVOC normalized emission rates, 0.9–3.1% for isoprene and 0.2–  
137 2.4% for other compounds." is added.

138 [Reference \(Yaman et al., 2015\)](#) is added in the reference list.

139

140 References:

141 [Yaman, B., Aydin, Y. M., Koca, H., Dasdemir, O., Kara, M., Altioek, H., Dumanoglu, Y.,](#)  
142 [Bayram, A., Tolunay, D., Odabasi, M., and Elbir, T.: Biogenic volatile organic compound](#)  
143 [\(BVOC\) emissions from various endemic tree species in Turkey, Aerosol Air Qual. Res.,](#)  
144 [15\(1\), 345-356, doi: 10.4209/aaqr.2014.04.0082, 2015.](#)

145 [Ortega, J., Helmig, D., Daly, R. W., Tanner, D. M., Guenther, A. B., and Herrick, J. D.:](#)  
146 [Approaches for quantifying reactive and low-volatility biogenic organic compound](#)  
147 [emissions by vegetation enclosure techniques - part B: applications, Chemosphere, 72\(3\),](#)  
148 [365-380, doi: 10.1016/j.chemosphere.2008.02.054, 2008.](#)

149

150 4. Line 178: What's the uncertainty for isoprene,  $\alpha$ -pinene,  $\beta$ -pinene and other species?

151 **Response: Accepted.**

152 We added the errors of isoprene,  $\alpha$ -pinene,  $\beta$ -pinene and other species measurements by  
153 GC-MS/FID system in the revised manuscript.

154 Line 179-181, "[A calibration was measured at 1 ppbv repeatedly for ten times to determine](#)  
155 [precision and detection limits.](#)" is added. Line 181-182, "The precision of the system for  
156 VOCs ranged from 0.5% to 4%." was modified to "[The precision of the system for isoprene,](#)  
157  [\$\alpha\$ -pinene,  \$\beta\$ -pinene, and acetylene were 2.30%, 3.65%, 3.37%, and 1.11%, respectively; the](#)  
158 [precision for other VOC species ranged from 0.5% to 4%.](#)".

159

160 5. Line 263: alkenes alkenes, please delete one alkenes.

161 **Response: Accepted.**

162 Line 281 in revised manuscript, [one "alkenes" is deleted.](#)

163

164 6. Line 308: ... new interval were eliminated due to possible measurement errors. Many old  
165 intervals were removed. Does it mean there were large measurement errors in the  
166 measurements? What are the reasons for this?

167 **Response: Accepted.**

168 We considered the measured emission rates outside the 95% confidence interval (CI) of each

169 interval had large random errors of measurements. The explanation for it is as follows.  
170 In our study, we firstly estimated a range of emission rates for each category according to the  
171 distribution. Because the measured values in each range displayed dispersed distributions  
172 with large standard deviations (SDs) relative to the mean, the mean could not represent the  
173 real emission for each isoprene emission category. Some observations falling in each category  
174 happened by chance. Therefore, we did additional statistics for all the values in each emission  
175 rate range separately. Using the *t*-test, we determined the 95% confidence interval (CI) of  
176 each range, which were considered to be the final emission rate interval for each emission  
177 category (Rivas-Ruiz et al., 2013). Here, the 95% CI was where the true emission rate of each  
178 emission category could locate with a large possibility of 95%. The true emission rate could  
179 locate outside the 95% CI with only a small possibility of 5%, which implied the values  
180 outside the 95% CI had lower reliability and larger errors. They could be considered as  
181 outliers and eliminated when doing statistics.

182 To make it more clear, we make a further explanation in the revised manuscript. Line 323-329,  
183 "Using the *t*-test, we determined the 95% confidence interval (CI) of each range, which we  
184 considered to be the final emission rate interval for each emission category (Table 4)." is  
185 revised to "Using the *t*-test, we determined the 95% confidence interval (CI) of each range  
186 (Rivas-Ruiz et al., 2013). Here, the 95% CI was where the true emission rate of each emission  
187 category could locate with a large possibility of 95%. The true emission rate could locate  
188 outside the 95% CI with only a small possibility of 5%, which implied the values outside the  
189 95% CI had lower reliability and larger errors. So we considered the determined 95% CI to be  
190 the final emission rate interval for each emission category (Table 4)". Line 329-331, "...  
191 outside the new interval were eliminated due to possible measurement errors ..." is modified  
192 to "... outside the new interval were eliminated due to possible large random errors of  
193 measurements ...".

194

195 Reference:

196 Rivas-Ruiz, R., Perez-Rodriguez, M., and Talavera, J. O.: Clinical research XV. From the  
197 clinical judgment to the statistical model. Difference between means. Student's *t* test,  
198 *Revista medica del Instituto Mexicano del Seguro Social*, 51(3): 300-3, 2013.

199

200 7. Line 354: Their use of fewer categories could result in underestimation of emission rates  
201 for plants with higher emission potentials. For example, the emission rate estimates of  
202 Eucalyptus, Quercus, Populus, and bamboo were much lower in previous studies than in our

203 study. What's the reason for this difference? which could result in an underestimation of 4.9–  
204 7.8 Tg C yr<sup>-1</sup> for isoprene emissions in China. How can get 4.9–7.8 Tg C yr<sup>-1</sup>?

205 **Response: Accepted.**

206 (1) We are sorry for our confused expression.

207 If fewer categories are used, such as three categories, emission of plants with “higher” or  
208 “lower” emission potential might be classified into “moderate” emission category, resulting in  
209 inexact representative emission rates. This might result in underestimation of emission rates  
210 for plants with higher emission potentials or overestimation of those for plants with lower  
211 emission potentials. However, there was a mistake here that the examples of *Eucalyptus*,  
212 *Quercus*, *Populus*, and bamboo were not the improper usage because their underestimations  
213 were mainly caused by using different emission categories and representative values.

214 To make it clear, we make a revision on this issue in the revised manuscript. Line 377-383,  
215 "Table 8 lists the isoprene emission categories and determined emission rates of some  
216 dominant tree species with higher emission potentials. In addition, previous studies used  
217 coarse emission intensity classifications (usually three to six classes) (Klinger et al., 2002;  
218 Yan et al., 2005; Wang et al., 2007), while we defined seven categories for the isoprene  
219 emission rates. Their use of fewer categories could result in underestimation of emission rates  
220 for plants with higher emission potentials. For example, the emission rate estimates of  
221 *Eucalyptus*, *Quercus*, *Populus*, and bamboo were much lower in previous studies than in our  
222 study (Klinger et al., 2002; Yan et al., 2005; Wang et al., 2007), which could result in an  
223 underestimation of 4.9–7.8 Tg C yr<sup>-1</sup> for isoprene emissions in China, estimated using the  
224 methodologies described in Li et al. (2013) and Li and Xie (2014)." is modified to "In  
225 addition, previous studies used coarse emission intensity classifications (usually three to six  
226 classes) (Table 8), which could result in inexact estimation of emission rates. Table 8 lists the  
227 isoprene emission categories and determined emission rates of some dominant tree species  
228 with higher emission potentials. The emission rate estimates of *Eucalyptus*, *Quercus*, *Populus*,  
229 and bamboo were much lower in previous studies than in our study (Klinger et al., 2002; Yan  
230 et al., 2005; Wang et al., 2007), which could result in an underestimation of 4.9–7.8 Tg C yr<sup>-1</sup>  
231 for isoprene emissions in China, estimated using the methodologies described in Li et al.  
232 (2013) and Li and Xie (2014).".

233 Line 88-90 in revised manuscript, "Some studies used coarse classifications of emission  
234 intensity, which might underestimate emission rates of plant species with high emission  
235 potentials." is modified to "Some studies used coarse classifications of emission intensity,  
236 which might result in overestimation or underestimation of emission rates.", accordingly.

237 (2) Here, “4.9–7.8 Tg C yr<sup>-1</sup>” was estimated according to the methodologies described in Li et

238 al. (2013) and Li and Xie (2014), by using different emission rate of *Eucalyptus*, *Quercus*,  
239 *Populus*, and bamboo in previous studies and our study, respectively.

240 Line 380-383, "... an underestimation of 4.9–7.8 Tg C yr<sup>-1</sup> for isoprene emissions in China." is  
241 revised to "... an underestimation of 4.9–7.8 Tg C yr<sup>-1</sup> for isoprene emissions in China,  
242 estimated using the methodologies described in Li et al. (2013) and Li and Xie (2014)".  
243 Reference (Li et al., 2013) and (Li and Xie, 2014) have been included in the reference list.

244

245 References:

246 Li, L.Y., Chen, Y., and Xie, S. D.: Spatio-temporal variation of biogenic volatile organic  
247 compounds emissions in China, *Environ. Pollut.*, 182, 157-168, doi:  
248 10.1016/j.envpol.2013.06.042, 2013.

249 Li, L.Y. and Xie, S. D.: Historical variations of biogenic volatile organic compound emission  
250 inventories in China, 1981-2003, *Atmos. Environ.*, 95, 185-196, doi:  
251 10.1016/j.atmosenv.2014.06.033, 2014.

252

253 8. Table 4 and Table 5: emission rates for isoprene and monoterpenes are almost the same?  
254 Some old mission rate intervals were removed in Table 5, which may be more useful data to  
255 understand realistic BVOC emissions.

256 **Response:**

257 (1) The representative emission values for each category in Table 3 and 4 (here the tables are  
258 numbered again because we delete the original Table 1 in Response to Reviewer #1's Other  
259 Comment 3) have differences of 0–10% for isoprene and 0–25% for monoterpene.

260 We added a quantitation for their differences in the revised manuscript. Line 331-332, "**The**  
261 **means for each emission category have also changed by 0–10% for isoprene and 0–25% for**  
262 **monoterpene.**" is added.

263 (2) About the reason why we eliminated the values outside the new interval when doing  
264 additional statistics, please refer to our **Response to Comment 6**.

265

266 9. Line 417: our emission rate categories were more detailed, and the emission rate interval  
267 and representative rates were more accurate. How can prove it?

268 **Response: Accepted.**

269 Please refer to our **Response to Comment 1**.



270

271 10. Table 6: What's the improvement for this study? Most of the normalized leaf-level  
272 isoprene and monoterpene emission rates in China are the same with the previous studies in  
273 the Table 6.

274 **Response:**

275 In our study, we have tried our best to collect the available original local measured data in  
276 China, but measurements were rare. So, sometimes we had to collect data from studies that  
277 only showed their estimated representative emission rates (e.g. 1, 70  $\mu\text{g C gdw}^{-1} \text{h}^{-1}$  for  
278 isoprene and 3  $\mu\text{g C gdw}^{-1} \text{h}^{-1}$  for monoterpene) for some plants using the traditional emission  
279 categories based on their original observations being not presented, such as studies of Klinger  
280 et al. (2002) and Guenther et al. (1996). This would inevitably influence the accuracy of our  
281 results. Although we performed field measurements of emission rates from 36 tree species in  
282 China using our established semi-static enclosure system and obtained 53 available emission  
283 samples to be used in the estimation of representative emission rates, the measured emission  
284 rates were not sufficient. If we can enhance the measurements and use the original data to  
285 estimate the emission intervals and representative rates in the future study, we will get  
286 different results from our current study. Our method can be improved constantly by more and  
287 more local reliable measurements. And the accuracy in the estimation of representative  
288 emission rates for each plant would be improved much with enhanced measurements.

289 We make an explanation to this issue in **Section 4.3 Comparison of representative emission**  
290 **rates** and also make an evaluation to our approach in **Section 5 Evaluation and uncertainty**  
291 **analysis** in the revised manuscript. Line 383-389, "Especially, from Table 8 and 5,  
292 representative values for some emission categories and determined leaf-level emission rates  
293 for some plants looked the same. Sometimes we had to collect data from studies that only  
294 showed their estimated representative emission rates (e.g. 1, 70  $\mu\text{g C gdw}^{-1} \text{h}^{-1}$  for isoprene  
295 and 3  $\mu\text{g C gdw}^{-1} \text{h}^{-1}$  for monoterpene) for some plants using the traditional emission  
296 categories based on their original observations being not presented, such as studies of Klinger  
297 et al. (2002) and Guenther et al. (1996), because the available original local measured data in  
298 China were relatively rare." is added. Line 419-424, "It is notable that the application of  
299 reported estimated representative emission rates for some plants using the traditional emission  
300 categories based on their original observations would influence the accuracy of our results  
301 unavoidably. Although we performed field measurements of emission rates in China and  
302 obtained 67 available emission samples to be used in the estimation of representative  
303 emission rates, it was still not enough." is added.

304 In our study, we believed that the estimation of representative emission rates applied in

305 emission inventory has been improved. About the improvement for our study, please refer to  
306 our **Response to Comment 1**.
